# Supplementary material for: Mesoporous Graphitic Carbon Nitrides Decorated with Cu Nanoparticles: Efficient Photocatalysts for Degradation of Tartrazine Yellow Dye
Source: MDPI journal article supplement (doi:10.3390/nano8090636), 2018-08-21
Supplement: s1 [file s1]

## Mesoporous graphitic carbon nitrides decorated with Cu nanoparticles: Efficient photocatalysts for degradation of tartrazine yellow

Tao Zhang<sup>1</sup>, Isis P. A. F. Souza<sup>2</sup>, Jiahe Xu<sup>1</sup>, Vitor C. Almeida<sup>2,\*</sup> and Tewodros Asefa<sup>1,3,\*</sup>

<sup>1</sup> Department of Chemical and Biochemical Engineering, Rutgers, The State University of New Jersey, 98 Brett Road, Piscataway, New Jersey 08854, USA

<sup>2</sup> Laboratory of Environmental and Agrochemistry, Department of Chemistry, State University of Maringá, 5790 Colombo Avenue, Maringá, 87020-900, Paraná, Brazil

<sup>3</sup> Department of Chemistry and Chemical Biology, Rutgers, The State University of New Jersey, 610 Taylor Road, Piscataway, New Jersey 08854, USA

\* Correspondences: (T.A.) E-mail: tasefa@chem.rutgers.edu; Tel.: +1-848-445-2970; (V.C.A.) E-mail: vcalmeida@uem.br; Tel.: +55 44 3011-4500

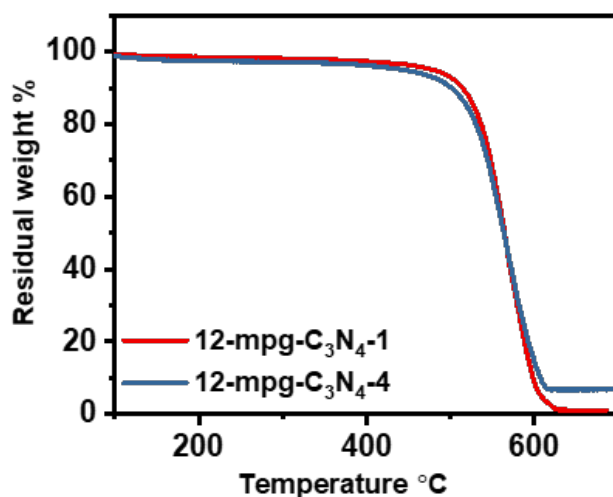

**Figure S1.** TGA curves obtained under air for 12-mpg-C<sub>3</sub>N<sub>4</sub>-1 and 12-mpg-C<sub>3</sub>N<sub>4</sub>-4 materials.

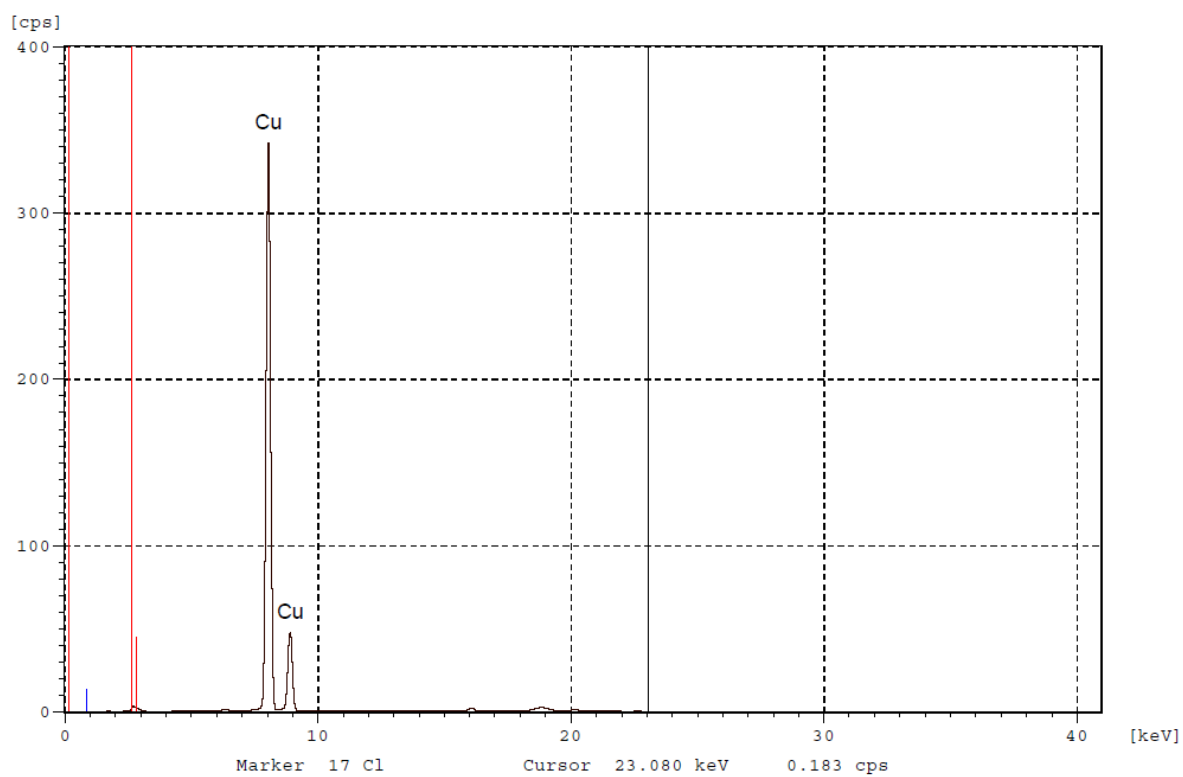

**Figure S2.** EDXRF results of 10Cu-22-mpg-C<sub>3</sub>N<sub>4</sub>-1.

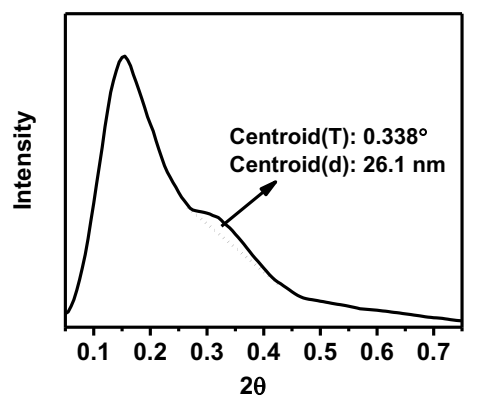

**Figure S3.** SAXS patterns of 22-mpg-C<sub>3</sub>N<sub>4</sub>-1.
